# Supplementary material
Source: publisher figshare collection journal article supplement (https://acs.figshare.com/ndownloader/files/4100053)
Supplement: Supplementary file 1 [file 4100053]

**Supporting Information:**

**Detection of  $\alpha$ -Synuclein Amyloidogenic Aggregates *In Vitro* and in Cells  
using Light-Switching Dipyrrophenazine Ruthenium(II) Complexes**

Nathan P. Cook,<sup>†,‡</sup> Kiri Kilpatrick,<sup>‡,‡</sup> Laura Segatori,<sup>‡,\$,#,\*</sup> Angel A. Martí<sup>†,\$,\*</sup>

Departments of <sup>†</sup>Chemistry, <sup>‡</sup>Chemical and Biomolecular Engineering, <sup>\$</sup>Bioengineering, and

<sup>#</sup>Biochemistry and Cell Biology. Rice University, Houston TX, 77005.

<sup>‡</sup> These authors contributed equally to this work

\*Corresponding Authors: [segatori@rice.edu](mailto:segatori@rice.edu), [amarti@rice.edu](mailto:amarti@rice.edu)

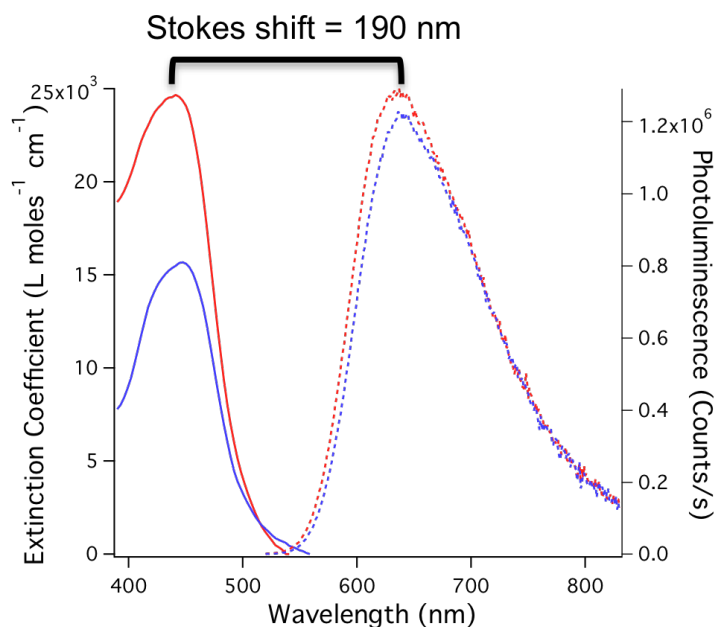

**Figure S1.** Absorption and emission spectra of dipyrrophenazine ruthenium (II) complexes. UV-Vis absorption spectra (full lines) and photoluminescence spectra upon 440 nm excitation (dashed lines) for 4.3  $\mu$ M solutions of  $[\text{Ru}(\text{bpy})_2\text{dppz}]^{2+}$  (blue) and  $[\text{Ru}(\text{phen})_2\text{dppz}]^{2+}$  (red) in acetonitrile.

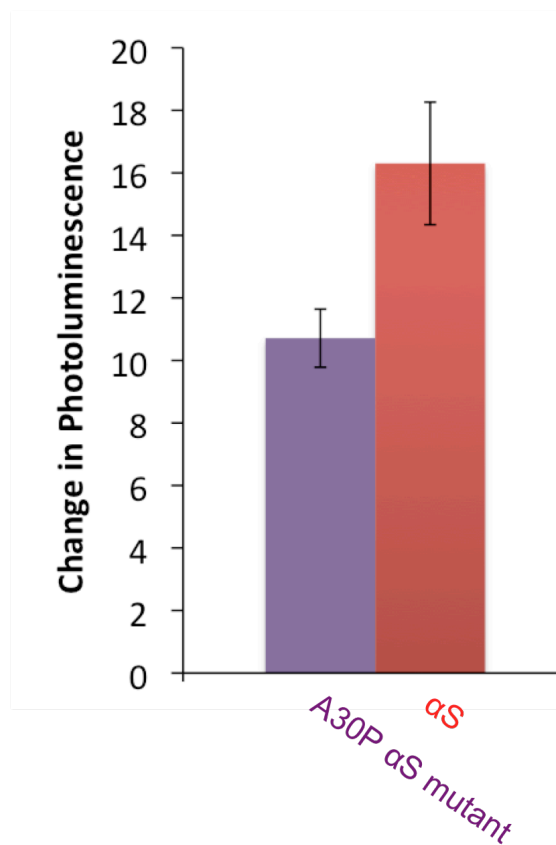

**Figure S2.** *In vitro* detection of A30P  $\alpha$  S fibrils using  $[\text{Ru}(\text{phen})_2\text{dppz}]^{2+}$ . Change in photoluminescence intensity of  $[\text{Ru}(\text{phen})_2\text{dppz}]^{2+}$  for the transition from monomeric to fibrillar state of A30P  $\alpha$  S (violet) and  $\alpha$  S (red).

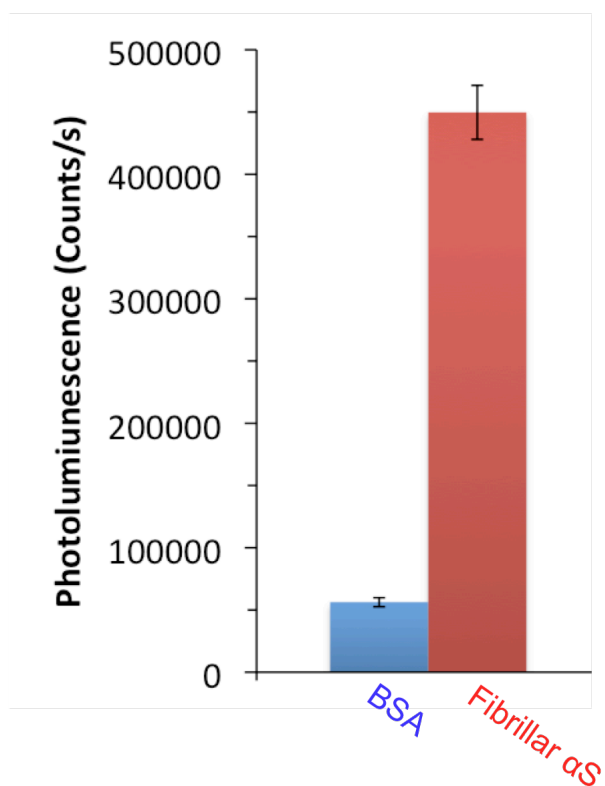

**Figure S3.** Comparison of the photoluminescence of intensity BSA and  $[\text{Ru}(\text{phen})_2\text{dppz}]^{2+}$ . Absolute photoluminescence intensities of  $[\text{Ru}(\text{phen})_2\text{dppz}]^{2+}$  in the presence of BSA and fibrillar  $\alpha$ S (1250  $\mu\text{g/mL}$ ).

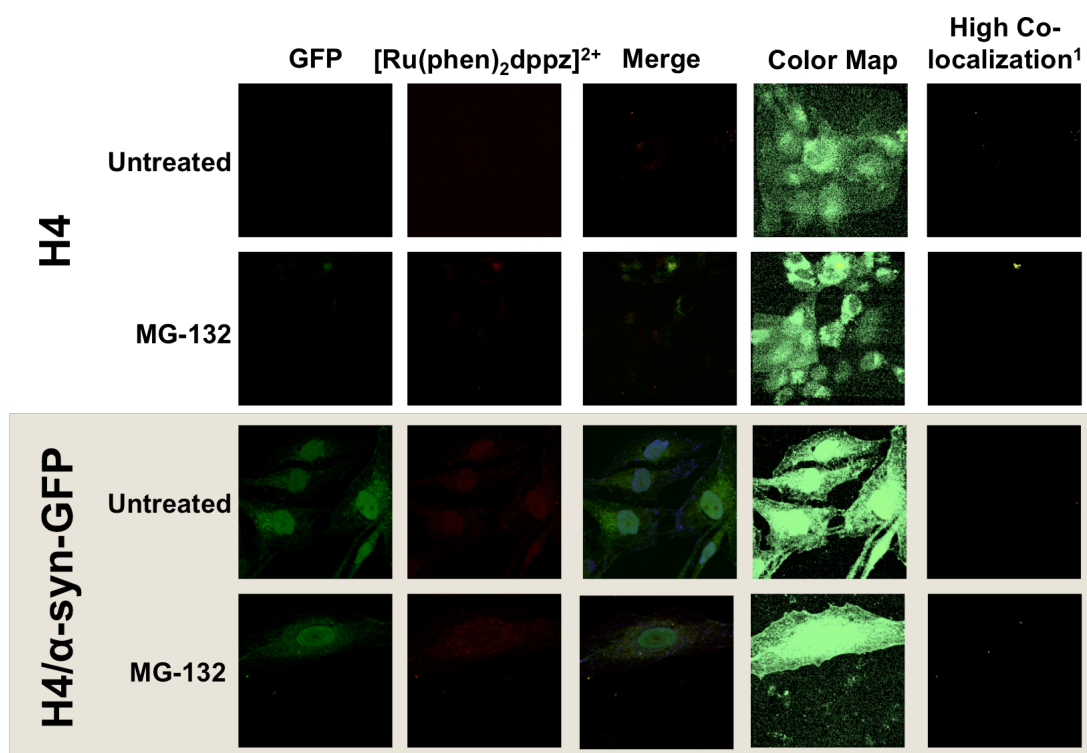

<sup>1</sup> Images filtered using color threshold to display positive correlation (Hue range 1-60).

**Figure S4.** [Ru(phen)<sub>2</sub>dppz]<sup>2+</sup> spectra do not overlap with GFP. Fluorescence microscopy images of H4 and H4/α-syn-GFP cells untreated and treated with MG-132 (2 μM) for 16 hr. [Ru(phen)<sub>2</sub>dppz]<sup>2+</sup> was not added to cells in order to determine if GFP fluorescence is observed in the channel used to detect [Ru(phen)<sub>2</sub>dppz]<sup>2+</sup>, demonstrating lack of spectra overlap.
